# Supplementary material for: Root NRT, NiR, AMT, GS, GOGAT and GDH expression levels reveal NO and ABA mediated drought tolerance in Brassica juncea L
Source: PubMed Central journal article supplement (PMC8041993; doi:10.1038/s41598-021-86401-0), 2021-04-12
Supplement: 41598_2021_86401_MOESM2_ESM.pdf [file 41598_2021_86401_MOESM2_ESM.pdf]

## Supplementary materials

**Root *NRT*, *NiR*, *AMT*, *GS*, *GOGAT* and *GDH* expression levels reveal NO and ABA mediated drought tolerance in *Brassica juncea* L.**

Seema Sahay<sup>1,2,3</sup>, Luis Robledo-Arratia<sup>2</sup>, Katarzyna Glowacka<sup>3</sup>, Meetu Gupta<sup>1\*</sup>

<sup>1</sup>Ecotoxicogenomics Lab, Department of Biotechnology, Jamia Millia Islamia, New Delhi-110025, India

<sup>2</sup>Departamento de Biología, Instituto Nacional de Investigaciones Nucleares (ININ), Ocoyoacac, C.P. 52750, México

<sup>3</sup>Department of Biochemistry and Center for Plant Science Innovation, University of Nebraska-Lincoln, Lincoln, NE-68588, USA

\*Corresponding author email: [meetu\\_gpt@yahoo.com](mailto:meetu_gpt@yahoo.com); [mgupta@jmi.ac.in](mailto:mgupta@jmi.ac.in) (Meetu Gupta)

This file includes:

Tables S1 to S8

**Supplementary Table S1** One way ANOVA  $p > 0.05$  values indicate no significant difference between control and NO or ABA treatments for different studied parameters.

| <b>Parameters</b>      | <b><i>p</i>-values<br/>(NO)</b> | <b><i>p</i>-values<br/>(ABA)</b> | <b>Parameters</b>                                           | <b><i>p</i>-values<br/>(NO)</b> | <b><i>p</i>-values<br/>(ABA)</b> |
|------------------------|---------------------------------|----------------------------------|-------------------------------------------------------------|---------------------------------|----------------------------------|
| Shoot length           | 0.476                           | 0.593                            | S                                                           | 0.596                           | 0.999                            |
| Root length            | 0.066                           | 0.136                            | N                                                           | 0.999                           | 1                                |
| Fresh weight           | 0.0048                          | 0.148                            | NO <sub>3</sub> <sup>-</sup>                                | 0.828                           | 0.993                            |
| Dry weight             | 0.136                           | 0.963                            | NO <sub>2</sub> <sup>-</sup>                                | 0.792                           | 1                                |
| Total free amino acids | 0.998                           | 1                                | NH <sub>4</sub> <sup>+</sup>                                | 0.972                           | 0.420                            |
| Proline                | 1                               | 1                                | NH <sub>4</sub> <sup>+</sup> / NO <sub>2</sub> <sup>-</sup> | 1                               | 0.969                            |
| P5CS                   | 0.974                           | 0.943                            | NR                                                          | 0.999                           | 0.992                            |
| ProDH                  | 0.999                           | 1                                | NiR                                                         | 0.986                           | 0.999                            |
| Fe                     | 0.381                           | 1                                | GS                                                          | 0.798                           | 1                                |
| Cu                     | 0.183                           | 1                                | GOGAT                                                       | 0.999                           | 1                                |
| Mn                     | 0.106                           | 0.914                            | NADPH-GDH                                                   | 0.703                           | 0.964                            |
| Zn                     | 0.236                           | 1                                | NADH-GDH                                                    | 0.693                           | 0.952                            |
| P                      | 0.804                           | 0.820                            | SNO                                                         | 0.0004                          | 0.0019                           |
| K                      | 0.992                           | 1                                | GSNO                                                        | 0.0062                          | 0.311                            |
| Ca                     | 0.401                           | 1                                | NOSLE                                                       | 0.907                           | 1                                |
| Mg                     | 0.219                           | 1                                | Evans blue uptake                                           | 0.911                           | 0.946                            |
| Na                     | 0.901                           | 0.426                            | GSNOR                                                       | 0.071                           | 0.490                            |

**Supplementary Table S2** Percent (%) -increase or decrease in all growth, biochemical and physiological parameters of 7-d-old *B. juncea* seedlings treated for another 96 h with PEG, NO, ABA and their combinations (nitrate agonists). (i) All treatments were compared with control. (ii) Nitrate agonist treatments were compared with PEG alone.

| Parameters                                                 | % -increase or decrease        |      |       |        |             |         |                                         |             |         |
|------------------------------------------------------------|--------------------------------|------|-------|--------|-------------|---------|-----------------------------------------|-------------|---------|
|                                                            | (i) All treatments vs. Control |      |       |        |             |         | (ii) PEG vs. Nitrate agonist treatments |             |         |
|                                                            | NO                             | ABA  | PEG   | PEG+NO | PEG+NO +ABA | PEG+ABA | PEG+NO                                  | PEG+NO +ABA | PEG+ABA |
| Evans Blue uptake                                          | 17.5                           | 14.1 | 193.5 | 52.5   | 61.5        | 71.7    | 48.0                                    | 43.9        | 39.4    |
| Total free amino acids                                     | 7.2                            | 1.4  | 84.0  | 18.8   | 27.5        | 39.1    | 35.4                                    | 30.7        | 24.4    |
| Proline                                                    | -3.6                           | -2.4 | 37.3  | 21.8   | 9.7         | 31.6    | -11.2                                   | -20.1       | -4.2    |
| P5CS                                                       | -2.9                           | -4.2 | 60.5  | 15.7   | 30.2        | -35.1   | -27.8                                   | -18.8       | -15.7   |
| ProDH                                                      | 2.1                            | 0.41 | -28.6 | -6.8   | -11.6       | -18.0   | 30.5                                    | 23.8        | 14.9    |
| Total SNO                                                  | 20.4                           | 17.6 | 28.3  | 38.5   | 32.1        | 35.6    | 7.8                                     | 2.9         | 5.6     |
| GSNO                                                       | 50.0                           | 30.6 | 62.9  | 96.7   | 90.3        | 82.2    | 20.7                                    | 16.8        | 11.8    |
| NOSLE                                                      | 12.0                           | 5.0  | 27.0  | 52.0   | 44.0        | 40.0    | 19.6                                    | 13.3        | 10.2    |
| GSNOR                                                      | 6.4                            | 4.7  | -30.6 | -9.9   | -17.5       | -22.4   | 29.7                                    | 18.8        | 11.7    |
| NO <sub>3</sub> <sup>-</sup>                               | 10.5                           | -2.6 | -52.6 | -13.1  | -21.0       | 34.2    | 83.3                                    | 66.5        | 38.4    |
| NO <sub>2</sub> <sup>-</sup>                               | 13.6                           | 4.5  | -59.0 | -18.1  | -22.7       | -36.3   | 98.9                                    | 88.2        | 55.1    |
| NH <sub>4</sub> <sup>+</sup>                               | 14.2                           | 28.5 | 125.0 | 71.4   | 82.1        | 96.3    | -23.8                                   | -19.0       | -12.6   |
| NH <sub>4</sub> <sup>+</sup> /NO <sub>3</sub> <sup>-</sup> | 0.78                           | 22.8 | 451.9 | 109.4  | 137.0       | 208.6   | -62.0                                   | -57.0       | -44.0   |
| N                                                          | 3.3                            | -2.3 | -33.3 | -8.7   | -14.7       | -20.0   | 36.9                                    | 27.8        | 19.9    |
| NR                                                         | 3.2                            | -4.5 | -39.2 | -13.0  | -16.9       | -24.1   | 43.0                                    | 36.5        | 24.7    |
| NiR                                                        | 6.2                            | -3.9 | -48.0 | -18.1  | -25.1       | -32.2   | 57.5                                    | 43.9        | 30.3    |

Continued from previous page

| Parameters | % -increase or decrease        |       |       |        |                |         |                                         |                |             |
|------------|--------------------------------|-------|-------|--------|----------------|---------|-----------------------------------------|----------------|-------------|
|            | (i) All treatments vs. Control |       |       |        |                |         | (ii) PEG vs. Nitrate agonist treatments |                |             |
|            | NO                             | ABA   | PEG   | PEG+NO | PEG+NO<br>+ABA | PEG+ABA | PEG+NO                                  | PEG+NO<br>+ABA | PEG+AB<br>A |
| GS         | 10.4                           | 1.3   | -39.7 | -10.2  | -15.2          | -23.7   | 48.8                                    | 40.6           | 26.4        |
| NADH-GOGAT | 8.6                            | 6.7   | -38.4 | -7.5   | -15.1          | -26.4   | 50.6                                    | 38.3           | 19.8        |
| NADPH-GDH  | 1.6                            | -1.3  | 55.2  | 8.1    | 15.3           | 29.4    | -30.3                                   | -25.6          | -16.6       |
| NADH-GDH   | 23.5                           | 16.0  | 142.4 | 56.6   | 62.2           | 89.6    | -35.4                                   | -33.0          | -21.7       |
| P          | 18.2                           | 17.6  | -46.5 | -2.5   | -9.5           | -17.4   | 82.2                                    | 69.2           | 54.5        |
| K          | 7.4                            | 1.1   | -54.4 | -1.8   | -2.1           | -24.4   | 115.3                                   | 114.5          | 65.6        |
| Ca         | 25.2                           | -1.8  | 27.0  | -2.2   | -3.2           | -7.7    | 33.9                                    | 32.7           | 26.4        |
| Mg         | 24.2                           | 2.7   | -44.7 | -2.1   | -10.8          | -23.3   | 77.0                                    | 61.3           | 38.6        |
| Na         | -7.2                           | -13.3 | -62.9 | -9.1   | -14.6          | -24.1   | 145.0                                   | 30.2           | 104.8       |
| S          | 15.2                           | 4.0   | -29.6 | -3.3   | -7.8           | -11.9   | 37.3                                    | 30.9           | 25.1        |
| Fe         | 27.3                           | 2.9   | -39.9 | 31.0   | -15.1          | -16.3   | 118.1                                   | 41.2           | 39.1        |
| Cu         | 33.0                           | 1.6   | -21.4 | -4.9   | 8.2            | 9.0     | 9.5                                     | 5.7            | 4.7         |
| Mn         | 23.6                           | 17.8  | -36.4 | 13.4   | -16.7          | 16.3    | 35.3                                    | 30.1           | 30.7        |
| Zn         | 28.6                           | -0.60 | -38.4 | -4.8   | -7.3           | 16.4    | 54.4                                    | 50.4           | 35.6        |

Negative values represent % decrease, whereas positive values represent % increase.

**Supplementary Table S3** One way ANOVA  $p < 0.05$  values for different studied parameters.

| <b>Parameters</b>      | <b><i>p</i>-values</b> | <b>Parameters</b>                                          | <b><i>p</i>-values</b> | <b>Parameters</b> | <b><i>p</i>-values</b> |
|------------------------|------------------------|------------------------------------------------------------|------------------------|-------------------|------------------------|
| Shoot length           | <.0001                 | N                                                          | 0.0022                 | <i>NRT1.3</i>     | <.0001                 |
| Root length            | <.0001                 | NO <sub>3</sub> <sup>-</sup>                               | <.0001                 | <i>NRT1.7</i>     | <.0001                 |
| Fresh weight           | <.0001                 | NO <sub>2</sub> <sup>-</sup>                               | <.0001                 | <i>NRT1.8</i>     | <.0001                 |
| Dry weight             | <.0001                 | NH <sub>4</sub> <sup>+</sup>                               | <.0001                 | <i>NRT2.1</i>     | <.0001                 |
| Total free amino acids | 0.0002                 | NH <sub>4</sub> <sup>+</sup> /NO <sub>2</sub> <sup>-</sup> | <.0001                 | <i>NRT2.7</i>     | <.0001                 |
| Proline                | 0.0484                 | NR                                                         | <.0001                 | <i>AMT1.1</i>     | <.0001                 |
| P5CS                   | <.0001                 | NiR                                                        | <.0001                 | <i>AMT1.2</i>     | <.0001                 |
| ProDH                  | 0.0003                 | GS                                                         | <.0001                 | <i>AMT2</i>       | <.0001                 |
| Fe                     | 0.0003                 | GOGAT                                                      | 0.032                  | <i>NR1</i>        | <.0001                 |
| Cu                     | 0.0165                 | NADPH-GDH                                                  | 0.0373                 | <i>NR2</i>        | <.0001                 |
| Mn                     | <.0001                 | NADH-GDH                                                   | <.0001                 | <i>NiR</i>        | <.0001                 |
| Zn                     | <.0001                 | SNO                                                        | 0.0025                 | <i>GS1.1</i>      | <.0001                 |
| P                      | 0.0011                 | GSNO                                                       | <.0001                 | <i>GS1.3</i>      | <.0001                 |
| K                      | <.0001                 | NOSLE                                                      | 0.0015                 | <i>GS2</i>        | <.0001                 |
| Ca                     | 0.0213                 | Evans blue uptake                                          | <.0001                 | <i>Fd-GOGAT</i>   | <.0001                 |
| Mg                     | <.0001                 | GSNOR                                                      | 0.0154                 | <i>NADH-GOGAT</i> | <.0001                 |
| Na                     | <.0001                 | <i>NTR1.1</i>                                              | <.0001                 | <i>GDH1</i>       | <.0001                 |
| S                      | 0.0021                 | <i>NRT1.2</i>                                              | <.0001                 | <i>GDH2</i>       | <.0001                 |

**Supplementary Table S4** The macro- and micro-nutrients contents of 7-d-old *B. juncea* seedlings treated for another 96 h with PEG, NO, ABA and their combinations (nitrate agonists). Values are mean  $\pm$  S.E. of three independent experiments, each including four biological replicates. Different letters represent significant difference between treatments, where “a” corresponds to the highest value and “d” or “e” to the lowest value.

| Treatments | Macronutrients                  |                                 |                                 |                                 |                                |                                |
|------------|---------------------------------|---------------------------------|---------------------------------|---------------------------------|--------------------------------|--------------------------------|
|            | P                               | K                               | Ca                              | Mg                              | Na                             | S                              |
| Control    | 12.05 $\pm$ 1.0 <sup>ab</sup>   | 6.01 $\pm$ 0.72 <sup>ab</sup>   | 2.18 $\pm$ 0.22 <sup>ab</sup>   | 10.62 $\pm$ 1.0 <sup>ab</sup>   | 15.86 $\pm$ 1.1 <sup>a</sup>   | 14.65 $\pm$ 0.83 <sup>bc</sup> |
| NO         | 14.25 $\pm$ 1.7 <sup>a</sup>    | 6.46 $\pm$ 0.35 <sup>a</sup>    | 2.73 $\pm$ 0.31 <sup>a</sup>    | 13.2 $\pm$ 0.70 <sup>a</sup>    | 14.55 $\pm$ 0.60 <sup>ab</sup> | 16.88 $\pm$ 0.69 <sup>a</sup>  |
| ABA        | 14.18 $\pm$ 1.0 <sup>a</sup>    | 6.08 $\pm$ 0.27 <sup>ab</sup>   | 2.14 $\pm$ 0.13 <sup>ab</sup>   | 10.91 $\pm$ 1.1 <sup>ab</sup>   | 13.58 $\pm$ 0.86 <sup>bc</sup> | 15.25 $\pm$ 0.66 <sup>ab</sup> |
| PEG        | 6.44 $\pm$ 0.63 <sup>d</sup>    | 2.74 $\pm$ 0.37 <sup>e</sup>    | 1.59 $\pm$ 0.11 <sup>e</sup>    | 5.87 $\pm$ 0.44 <sup>e</sup>    | 5.81 $\pm$ 0.51 <sup>e</sup>   | 10.31 $\pm$ 0.65 <sup>e</sup>  |
| PEG+NO     | 11.74 $\pm$ 1.1 <sup>b</sup>    | 5.90 $\pm$ 0.56 <sup>bc</sup>   | 2.13 $\pm$ 0.18 <sup>bc</sup>   | 10.39 $\pm$ 0.74 <sup>b</sup>   | 14.24 $\pm$ 0.82 <sup>ab</sup> | 14.16 $\pm$ 0.77 <sup>bc</sup> |
| PEG+NO+ABA | 10.90 $\pm$ 1.0 <sup>bc</sup>   | 5.88 $\pm$ 0.30 <sup>bc</sup>   | 2.11 $\pm$ 0.15 <sup>bc</sup>   | 9.47 $\pm$ 0.26 <sup>bc</sup>   | 13.38 $\pm$ 0.67 <sup>bc</sup> | 13.5 $\pm$ 0.96 <sup>cd</sup>  |
| PEG+ABA    | 9.95 $\pm$ 0.77 <sup>c</sup>    | 4.54 $\pm$ 0.32 <sup>d</sup>    | 2.01 $\pm$ 0.07 <sup>d</sup>    | 8.14 $\pm$ 0.40 <sup>d</sup>    | 11.9 $\pm$ 0.74 <sup>d</sup>   | 12.9 $\pm$ 0.97 <sup>d</sup>   |
|            | Micronutrients                  |                                 |                                 |                                 |                                |                                |
|            | Fe                              | Cu                              | Mn                              | Zn                              |                                |                                |
| Control    | 0.238 $\pm$ 0.021 <sup>ab</sup> | 0.012 $\pm$ 0.001 <sup>ab</sup> | 0.076 $\pm$ 0.004 <sup>ab</sup> | 0.164 $\pm$ 0.008 <sup>b</sup>  |                                |                                |
| NO         | 0.303 $\pm$ 0.023 <sup>a</sup>  | 0.016 $\pm$ 0.002 <sup>a</sup>  | 0.094 $\pm$ 0.005 <sup>a</sup>  | 0.211 $\pm$ 0.011 <sup>a</sup>  |                                |                                |
| ABA        | 0.245 $\pm$ 0.028 <sup>ab</sup> | 0.012 $\pm$ 0.001 <sup>ab</sup> | 0.089 $\pm$ 0.002 <sup>a</sup>  | 0.163 $\pm$ 0.010 <sup>b</sup>  |                                |                                |
| PEG        | 0.143 $\pm$ 0.013 <sup>d</sup>  | 0.0090 $\pm$ 0.001 <sup>d</sup> | 0.048 $\pm$ 0.005 <sup>d</sup>  | 0.101 $\pm$ 0.009 <sup>e</sup>  |                                |                                |
| PEG+NO     | 0.312 $\pm$ 0.029 <sup>a</sup>  | 0.012 $\pm$ 0.001 <sup>ab</sup> | 0.066 $\pm$ 0.004 <sup>bc</sup> | 0.156 $\pm$ 0.007 <sup>bc</sup> |                                |                                |
| PEG+NO+ABA | 0.202 $\pm$ 0.025 <sup>bc</sup> | 0.011 $\pm$ 0.00 <sup>bc</sup>  | 0.063 $\pm$ 0.001 <sup>bc</sup> | 0.152 $\pm$ 0.014 <sup>bc</sup> |                                |                                |
| PEG+ABA    | 0.199 $\pm$ 0.011 <sup>bc</sup> | 0.011 $\pm$ 0.001 <sup>bc</sup> | 0.063 $\pm$ 0.002 <sup>bc</sup> | 0.137 $\pm$ 0.005 <sup>d</sup>  |                                |                                |

**Supplementary Table S5** Relative expression levels (fold change values) of N uptake, transport and utilization representative key genes of 7-d-old *B. juncea* seedlings treated for another 96 h with PEG, NO, ABA and their combinations. Values are mean of four biological replicates taken from three independent experiments. Values in parentheses show 95% CI with upper and lower bounds. Same lowercase letters (a-e) represent no significant difference between treatments, determined by Tukey's test.

| <b>Genes</b>      | <b>NO</b>                       | <b>ABA</b>                     | <b>PEG</b>                      | <b>PEG+NO</b>                  | <b>PEG+NO+ABA</b>               | <b>PEG+ABA</b>                  |
|-------------------|---------------------------------|--------------------------------|---------------------------------|--------------------------------|---------------------------------|---------------------------------|
| <i>NRT1.1</i>     | 1.40 (1.31, 1.49) <sup>c</sup>  | 1.23 (1.15, 1.31) <sup>c</sup> | 0.62 (0.53, 0.71) <sup>e</sup>  | 3.25 (2.96, 3.54) <sup>a</sup> | 2.80 (2.44, 3.17) <sup>a</sup>  | 2.01 (1.90, 2.12) <sup>b</sup>  |
| <i>NRT1.2</i>     | 1.31 (1.24, 1.37) <sup>c</sup>  | 1.22 (1.15, 1.29) <sup>c</sup> | 0.73 (0.66, 0.80) <sup>d</sup>  | 3.80 (3.19, 4.41) <sup>a</sup> | 3.21 (2.71, 3.73) <sup>ab</sup> | 2.49 (2.25, 2.74) <sup>b</sup>  |
| <i>NRT1.3</i>     | 1.23 (1.17, 1.28) <sup>d</sup>  | 1.09 (1.05, 1.13) <sup>d</sup> | 0.53 (0.45, 0.62) <sup>e</sup>  | 2.52 (2.07, 2.98) <sup>a</sup> | 2.16 (1.96, 2.38) <sup>ab</sup> | 1.74 (1.58, 1.92) <sup>c</sup>  |
| <i>NRT1.7</i>     | 1.22 (1.18, 1.28) <sup>d</sup>  | 1.01 (0.88, 1.06) <sup>d</sup> | 2.61 (2.42, 2.88) <sup>a</sup>  | 1.71 (1.45, 1.97) <sup>c</sup> | 1.89 (1.59, 2.19) <sup>bc</sup> | 2.19 (1.91, 2.49) <sup>b</sup>  |
| <i>NRT1.8</i>     | 1.20 (1.16, 1.25) <sup>c</sup>  | 1.19 (1.11, 1.28) <sup>c</sup> | 0.44 (0.36, 0.51) <sup>d</sup>  | 1.76 (1.55, 1.97) <sup>a</sup> | 1.51 (1.33, 1.71) <sup>ab</sup> | 1.38 (1.27, 1.50) <sup>b</sup>  |
| <i>NRT2.1</i>     | 1.30 (1.24, 1.35) <sup>c</sup>  | 1.09 (1.05, 1.15) <sup>c</sup> | 0.72 (0.65, 0.79) <sup>d</sup>  | 2.89 (2.37, 3.42) <sup>a</sup> | 2.61(2.25, 2.97) <sup>a</sup>   | 2.08 (2.06, 2.11) <sup>b</sup>  |
| <i>NRT2.7</i>     | 1.51 (1.45, 1.57) <sup>c</sup>  | 1.19 (1.14, 1.26) <sup>c</sup> | 0.39 (0.33, 0.46) <sup>d</sup>  | 2.32 (2.03, 2.62) <sup>a</sup> | 1.79 (1.62, 1.97) <sup>b</sup>  | 1.81 (1.64, 1.98) <sup>b</sup>  |
| <i>AMT1.1</i>     | 1.11 (1.06, 1.15) <sup>c</sup>  | 1.10 (0.99, 1.22) <sup>c</sup> | 0.22 (0.02, 0.42) <sup>d</sup>  | 2.29 (1.92, 2.67) <sup>a</sup> | 1.99 (1.68, 2.32) <sup>ab</sup> | 1.71 (1.51, 1.91) <sup>b</sup>  |
| <i>AMT1.2</i>     | 0.99 (0.88, 1.09) <sup>d</sup>  | 1.01 (0.86, 1.05) <sup>d</sup> | 4.45 (4.02, 4.90) <sup>a</sup>  | 2.80 (2.52, 3.08) <sup>c</sup> | 2.80 (2.77, 2.83) <sup>c</sup>  | 3.39 (2.85, 3.94) <sup>bc</sup> |
| <i>AMT2</i>       | 1.20 (1.15, 1.25) <sup>c</sup>  | 1.10 (1.02, 1.18) <sup>d</sup> | 0.17 (0.08, 0.26) <sup>dc</sup> | 3.30 (2.84, 3.76) <sup>a</sup> | 2.62 (2.26, 2.98) <sup>a</sup>  | 1.82 (1.58, 2.08) <sup>b</sup>  |
| <i>NRI</i>        | 1.31(1.24, 1.37) <sup>c</sup>   | 1.20 (1.09, 1.31) <sup>c</sup> | 0.70 (0.62, 0.79) <sup>d</sup>  | 1.90 (1.62, 2.18) <sup>a</sup> | 1.52 (1.22, 1.83) <sup>ab</sup> | 1.49 (1.16, 1.39) <sup>b</sup>  |
| <i>NR2</i>        | 1.39 (1.32, 1.47) <sup>c</sup>  | 1.01 (0.88, 1.08) <sup>d</sup> | 0.52 (0.45, 0.59) <sup>e</sup>  | 1.86 (1.56, 2.18) <sup>a</sup> | 1.55(1.24, 1.86) <sup>ab</sup>  | 1.31 (1.16, 1.46) <sup>b</sup>  |
| <i>NiR</i>        | 1.40 (1.32, 1.47) <sup>b</sup>  | 1.01 (0.88, 1.08) <sup>c</sup> | 0.40 (0.31, 0.49) <sup>d</sup>  | 1.86 (1.62, 2.12) <sup>a</sup> | 1.80 (1.59, 1.01) <sup>a</sup>  | 0.98 (0.92, 1.06) <sup>c</sup>  |
| <i>GSI.1</i>      | 1.21 (1.17, 1.25) <sup>bc</sup> | 1.16 (1.08, 1.23) <sup>d</sup> | 0.21 (0.11, 0.31) <sup>e</sup>  | 1.56 (1.32, 1.80) <sup>a</sup> | 1.29 (1.15, 1.44) <sup>ab</sup> | 1.15 (1.06, 1.24) <sup>cd</sup> |
| <i>GSI.3</i>      | 1.11 (1.03, 1.18) <sup>c</sup>  | 1.11 (1.04, 1.18) <sup>c</sup> | 0.63 (0.53, 0.67) <sup>d</sup>  | 1.88 (1.63, 2.14) <sup>a</sup> | 1.73 (1.54, 1.92) <sup>a</sup>  | 1.21 (1.11, 1.33) <sup>b</sup>  |
| <i>GS2</i>        | 1.70 (1.69, 1.91) <sup>a</sup>  | 1.30 (1.20, 1.40) <sup>b</sup> | 0.84 (0.77, 0.91) <sup>c</sup>  | 1.61 (1.39, 1.83) <sup>a</sup> | 1.33 (1.17, 1.49) <sup>ab</sup> | 1.29 (1.17, 1.42) <sup>b</sup>  |
| <i>Fd-GOGAT</i>   | 1.29 (1.23, 1.36) <sup>c</sup>  | 1.19 (1.14, 1.26) <sup>c</sup> | 0.52 (0.28, 0.76) <sup>d</sup>  | 2.66 (2.38, 2.94) <sup>a</sup> | 2.59 (2.32, 2.88) <sup>a</sup>  | 1.99 (1.74, 2.25) <sup>b</sup>  |
| <i>NADH-GOGAT</i> | 1.11 (0.99, 1.22) <sup>d</sup>  | 1.11 (1.06, 1.15) <sup>d</sup> | 0.80 (0.71, 0.90) <sup>e</sup>  | 3.73 (3.42, 4.02) <sup>a</sup> | 3.11 (2.90, 3.34) <sup>bc</sup> | 2.60 (2.32, 2.90) <sup>c</sup>  |
| <i>GDH1</i>       | 1.40 (1.31, 1.48) <sup>d</sup>  | 1.30 (1.23, 1.37) <sup>d</sup> | 3.84 (3.29, 4.40) <sup>a</sup>  | 1.82 (1.42, 2.25) <sup>c</sup> | 1.98 (1.79, 2.15) <sup>c</sup>  | 2.87 (2.61, 3.11) <sup>b</sup>  |
| <i>GDH2</i>       | 1.60 (1.45, 1.75) <sup>b</sup>  | 1.21 (1.15, 1.27) <sup>d</sup> | 2.73 (2.53, 2.94) <sup>a</sup>  | 1.48 (1.23, 1.60) <sup>c</sup> | 1.41 (1.16, 1.50) <sup>c</sup>  | 1.89 (1.69, 2.09) <sup>b</sup>  |

**Supplementary Table S6** List of 20 primer sequences of nitrogen uptake and assimilation genes of *B. juncea* used in RT-PCR study.

| S. No. | Genes               | Primer sequence 5'-3'       |                              |
|--------|---------------------|-----------------------------|------------------------------|
| 1.     | <i>BjNRT1.1</i>     | F: CTCCTCGGAAC TTCG TTCATG  | R: TTGGATAGCGGCGAATATAGC     |
| 2.     | <i>BjNRT1.2</i>     | F: ATCTGGCGAATGCAAGTAACCT   | R: GCTGTGCCCATGAAGTTGGT      |
| 3.     | <i>BjNRT1.3</i>     | F: CAAGCCATGTTTATGGAGCGTAA  | R: TAAGGGAAGTGAAGAGGAGAATGGT |
| 4.     | <i>BjNRT1.7</i>     | F: TCGGCGCGTTTATCTCAGA      | R: GGTGGCGAATGAGGCAAA        |
| 5.     | <i>BjNRT1.8</i>     | F: AATGCAGAAGCTGCCAATAGTG   | R: TGTAGCGTCCCCAATAAGAGTCA   |
| 6.     | <i>BjNRT2.1</i>     | F: AAGAACATGCTTCCCCACTGA    | R: TCACAACCGAACAAGGGCTAA     |
| 7.     | <i>BjNRT2.7</i>     | F: TCCTAGCGCTTCTGTACGGTTAC  | R: GCCTCTAGATTCACGCCGAAT     |
| 8.     | <i>BjAMT1.1</i>     | F: CAAACGGCTTCATCGGAAAA     | R: GCGATAGCAAAAGCCCATTG      |
| 9.     | <i>BjAMT1.2</i>     | F: CCACAGCTTTTTTCGCCTTGA    | R: GATTCCCGCTGCGGCTATA       |
| 10.    | <i>BjAMT2</i>       | F: CAGTTCCATGGGCCTCTATGA    | R: CCGGCTACTGCGTGTGTGTA      |
| 11.    | <i>BjNR1</i>        | F: TCCGGCGAAGTTCACCAT       | R: CGGCGCATAACGAGAGTCA       |
| 12.    | <i>BjNR2</i>        | F: GTTTACTTCAAGAACGTCCATCCA | R: CGGTAGCGAGTCCAAATGCT      |
| 13.    | <i>BjNiR</i>        | F: CCAAAGATGCGAAGAGGCTAT    | R: CTTTGCAGAGTGGAAGAACATCA   |
| 14.    | <i>BjGS1.1</i>      | F: GCCTCTTGGTTGGCCTATTG     | R: AGCATCAACGATGTCTCTACCAAA  |
| 15.    | <i>BjGS1.3</i>      | F: CGACTCCACCAAGCAAATCA     | R: ATCGCTCACTGGTCCTGGAA      |
| 16.    | <i>BjGS2</i>        | F: CACATCAAATCCTCCTTCTCTCT  | R: AACACTTGATCCCAAACCCATAGA  |
| 17.    | <i>BjFd-GOGAT</i>   | F: GCCTTGCGCGAACTCAA        | R: GGACGGTCTCTACAGCCAGATATG  |
| 18.    | <i>BjNADH-GOGAT</i> | F: GCCTTGCGCGAACTCAA        | R: CCAGATATGGGCAGATAGCATCT   |
| 19.    | <i>BjGDH1</i>       | F: AACCCCTGGATGACAAAACG     | R: GAGACGCGGCTACAGGAAGA      |
| 20.    | <i>BjGDH2</i>       | F: CCTGAAGGCATCGACATCAA     | R: GCAGCTCCTCAGAGTCCATAGC    |
| 21.    | <i>BjACT</i>        | F: TTCAATGTCCCTGCCATGTA     | R: TTGATCTTCATGCTGCTTGG      |



**Supplementary Table S7** Accession numbers of nitrogen uptake and assimilation genes of *B. juncea* used in RT-PCR study.

| <b>Genes</b>        | <b>Accession numbers</b> | <b>Description</b>                      |
|---------------------|--------------------------|-----------------------------------------|
| <i>BjNRT1.1</i>     | KT119578                 | Low affinity nitrate transporter 1.1    |
| <i>BjNRT1.2</i>     | KT119579                 | Low affinity nitrate transporter 1.2    |
| <i>BjNRT1.3</i>     | KT119580                 | Low affinity nitrate transporter 1.3    |
| <i>BjNRT1.7</i>     | KT119583                 | Low affinity nitrate transporter 1.7    |
| <i>BjNRT1.8</i>     | KT119584                 | Low affinity nitrate transporter 1.8    |
| <i>BjNRT2.1</i>     | KT119585                 | High affinity nitrate transporter 2.1   |
| <i>BjNRT2.7</i>     | KT119586                 | High affinity nitrate transporter 2.7   |
| <i>BjAMT1.1</i>     | KT119596                 | Ammonium transporter 1.1                |
| <i>BjAMT1.2</i>     | KT119597                 | Ammonium transporter 1.2                |
| <i>BjAMT2</i>       | KT119598                 | Ammonium transporter 2                  |
| <i>BjNR1</i>        | KT119587                 | Nitrate reductase 1                     |
| <i>BjNR2</i>        | KT119588                 | Nitrate reductase 1                     |
| <i>BjNiR</i>        | KT119589                 | Nitrite reductase                       |
| <i>BjGS1.1</i>      | KT119590                 | Cytoplasmic glutamine synthetase 1.1    |
| <i>BjGS1.3</i>      | KT119591                 | Cytoplasmic glutamine synthetase 1.3    |
| <i>BjGS2</i>        | KT119593                 | Cytoplasmic glutamine synthetase 2      |
| <i>BjFd-GOGAT</i>   | KT119603                 | Ferredoxin-dependent glutamate synthase |
| <i>BjNADH-GOGAT</i> | KT119604                 | NADH-dependent glutamate synthase 1     |
| <i>GDH1</i>         | KT119594                 | Chloroplastic glutamate dehydrogenase 1 |
| <i>GDH2</i>         | KT119595                 | Mitochondrial glutamate dehydrogenase 2 |

**Supplementary Table S8** Ct values of *B. juncea* reference gene *actin* showing stable expression at different treatment levels of PEG, NO, ABA and their combinations.

| Samples    | Replicates | Ct values    |              |              |
|------------|------------|--------------|--------------|--------------|
|            |            | Experiment 1 | Experiment 2 | Experiment 3 |
| Control    | R1         | 18.23        | 17.66        | 18.45        |
|            | R2         | 19.01        | 18.12        | 17.93        |
|            | R3         | 18.74        | 18.12        | 18.02        |
|            | R4         | 18.83        | 18.03        | 18.63        |
| NO         | R1         | 19.12        | 18.17        | 18.15        |
|            | R2         | 18.67        | 18.16        | 17.82        |
|            | R3         | 18.99        | 18.22        | 17.91        |
|            | R4         | 18.45        | 18.18        | 18.38        |
| ABA        | R1         | 17.93        | 19.11        | 18.31        |
|            | R2         | 18.02        | 18.84        | 18.22        |
|            | R3         | 18.23        | 18.83        | 18.63        |
|            | R4         | 18.55        | 19.22        | 18.82        |
| PEG        | R1         | 17.78        | 18.76        | 18.53        |
|            | R2         | 17.94        | 18.55        | 18.11        |
|            | R3         | 18.21        | 18.45        | 18.76        |
|            | R4         | 18.12        | 17.93        | 18.42        |
| PEG+NO     | R1         | 18.33        | 17.91        | 17.85        |
|            | R2         | 18.31        | 17.77        | 17.91        |
|            | R3         | 18.16        | 18.32        | 18.32        |
|            | R4         | 18.44        | 18.41        | 18.47        |
| PEG+ABA+NO | R1         | 18.32        | 18.57        | 18.38        |
|            | R2         | 18.11        | 19.03        | 19.13        |
|            | R3         | 18.67        | 18.66        | 18.76        |
|            | R4         | 18.24        | 18.83        | 18.83        |
| PEG+ABA    | R1         | 17.85        | 19.12        | 18.88        |
|            | R2         | 17.91        | 18.67        | 18.61        |
|            | R3         | 18.22        | 18.22        | 18.18        |
|            | R4         | 18.12        | 18.44        | 18.54        |
